# Supplementary material for: How has the emergence of the Omicron SARS-CoV-2 variant of concern influenced worry, perceived risk and behaviour in the UK? A series of cross-sectional surveys
Source: PubMed Central journal article supplement (PMC9437738; doi:10.1136/bmjopen-2022-061203), 2022-08-29
Supplement: bmjopen-2022-061203supp001.pdf [file bmjopen-2022-061203supp001.pdf]

## Supplementary materials

Figure 1. Timeline of announcements, data collection, and dates of self-reported behaviours. All dates 2021.

|        |                                                                    |           |                                          |  |                                            |  |
|--------|--------------------------------------------------------------------|-----------|------------------------------------------|--|--------------------------------------------|--|
| 22-Nov |                                                                    |           | Wave 63<br>"past seven days" could cover |  |                                            |  |
| 23-Nov |                                                                    |           |                                          |  |                                            |  |
| 24-Nov | Omicron variant reported to WHO                                    |           |                                          |  |                                            |  |
| 25-Nov |                                                                    |           |                                          |  |                                            |  |
| 26-Nov | Omicron designated a variant of concern                            |           |                                          |  |                                            |  |
| 27-Nov | New measures announced<br>First UK cases                           |           |                                          |  |                                            |  |
| 28-Nov |                                                                    |           |                                          |  |                                            |  |
| 29-Nov |                                                                    | Wave 63   |                                          |  | Wave 63.5<br>"past seven days" could cover |  |
| 30-Nov | New measures take effect<br><i>Daily Mirror</i> breaks 'Partygate' |           |                                          |  |                                            |  |
| 01-Dec |                                                                    |           |                                          |  |                                            |  |
| 02-Dec |                                                                    |           |                                          |  |                                            |  |
| 03-Dec | Omicron cases in the UK exceed 100                                 |           |                                          |  |                                            |  |
| 04-Dec |                                                                    |           |                                          |  |                                            |  |
| 05-Dec |                                                                    |           |                                          |  |                                            |  |
| 06-Dec |                                                                    | Wave 63.5 |                                          |  | Wave 64<br>"past seven days" could cover   |  |
| 07-Dec | ITV reports on a video seeming to confirm 'Partygate'              |           |                                          |  |                                            |  |
| 08-Dec | "Plan B" announced                                                 |           |                                          |  |                                            |  |
| 09-Dec |                                                                    |           |                                          |  |                                            |  |
| 10-Dec |                                                                    |           |                                          |  |                                            |  |
| 11-Dec |                                                                    |           |                                          |  |                                            |  |
| 12-Dec |                                                                    |           |                                          |  |                                            |  |
| 13-Dec | "Plan B" mostly takes effect<br>First UK death from Omicron        | Wave 64   |                                          |  |                                            |  |

|        |                                                       |  |  |  |  |
|--------|-------------------------------------------------------|--|--|--|--|
| 14-Dec |                                                       |  |  |  |  |
| 15-Dec | UK records its highest number of daily cases (78,610) |  |  |  |  |
| 16-Dec | UK records its highest number of daily cases (88,376) |  |  |  |  |

Table 1. Associations between out-of-home activities and socio-demographic factors, adjusting for all other socio-demographic factors. Bolding denotes significant findings ( $p < .002$ ).

| Attribute                                         | Level                                                               | Going out shopping (for groceries/pharmacy and other items) [block 1] |          |                                                              |          | Attending the workplace [block 1]                                   |          |                                                                   |          |
|---------------------------------------------------|---------------------------------------------------------------------|-----------------------------------------------------------------------|----------|--------------------------------------------------------------|----------|---------------------------------------------------------------------|----------|-------------------------------------------------------------------|----------|
|                                                   |                                                                     | Wave 63.5 <sup>a</sup><br>aIRR for going out shopping (95% CI)        | <i>p</i> | Wave 64 <sup>b</sup><br>aIRR for going out shopping (95% CI) | <i>p</i> | Wave 63.5 <sup>c</sup><br>aIRR for attending the workplace (95% CI) | <i>p</i> | Wave 64 <sup>d</sup><br>aIRR for attending the workplace (95% CI) | <i>p</i> |
| Region                                            | East Midlands                                                       | Ref                                                                   | -        | Ref                                                          | -        | Ref                                                                 | -        | Ref                                                               | -        |
|                                                   | East of England                                                     | 0.93 (0.72 to 1.21)                                                   | 0.59     | 0.90 (0.70 to 1.15)                                          | 0.40     | 1.07 (0.53 to 2.16)                                                 | 0.84     | 0.94 (0.52 to 1.70)                                               | 0.83     |
|                                                   | London                                                              | 1.10 (0.84 to 1.44)                                                   | 0.48     | 1.09 (0.86 to 1.39)                                          | 0.46     | 0.93 (0.51 to 1.69)                                                 | 0.81     | 1.15 (0.69 to 1.92)                                               | 0.60     |
|                                                   | North East                                                          | 1.01 (0.71 to 1.45)                                                   | 0.94     | 0.96 (0.71 to 1.31)                                          | 0.81     | 0.83 (0.38 to 1.84)                                                 | 0.65     | 1.07 (0.49 to 2.34)                                               | 0.86     |
|                                                   | North West                                                          | 1.08 (0.83 to 1.42)                                                   | 0.57     | 1.06 (0.84 to 1.33)                                          | 0.63     | 1.17 (0.62 to 2.18)                                                 | 0.63     | 0.91 (0.53 to 1.58)                                               | 0.75     |
|                                                   | South East                                                          | 0.99 (0.77 to 1.27)                                                   | 0.93     | 0.94 (0.75 to 1.17)                                          | 0.57     | 0.96 (0.51 to 1.82)                                                 | 0.90     | 1.14 (0.67 to 1.97)                                               | 0.63     |
|                                                   | South West                                                          | 0.98 (0.75 to 1.30)                                                   | 0.91     | 1.05 (0.82 to 1.35)                                          | 0.68     | 1.50 (0.79 to 2.84)                                                 | 0.22     | 1.54 (0.81 to 2.91)                                               | 0.18     |
|                                                   | West Midlands                                                       | 1.13 (0.86 to 1.49)                                                   | 0.37     | 1.02 (0.80 to 1.31)                                          | 0.86     | 1.32 (0.71 to 2.46)                                                 | 0.38     | 0.78 (0.44 to 1.39)                                               | 0.41     |
|                                                   | Yorkshire and The Humber                                            | 1.37 (0.99 to 1.90)                                                   | 0.06     | 0.89 (0.70 to 1.13)                                          | 0.33     | 1.24 (0.53 to 2.88)                                                 | 0.62     | 0.67 (0.35 to 1.31)                                               | 0.24     |
|                                                   | Overall                                                             | $\chi^2(8)=9.3$                                                       | 0.32     | $\chi^2(8)=6.6$                                              | 0.58     | $\chi^2(8)=5.9$                                                     | 0.66     | $\chi^2(8)=7.9$                                                   | 0.44     |
| Sex                                               | Male                                                                | Ref                                                                   | -        | Ref                                                          | -        | Ref                                                                 | -        | Ref                                                               | -        |
|                                                   | Female                                                              | 0.83 (0.74 to 0.94)                                                   | 0.002    | 0.94 (0.84 to 1.05)                                          | 0.25     | 0.72 (0.54 to 0.96)                                                 | 0.03     | 0.72 (0.54 to 0.95)                                               | 0.02     |
| Age (per decade)                                  | Raw age                                                             | 0.95 (0.91 to 0.99)                                                   | 0.02     | 0.98 (0.94 to 1.01)                                          | 0.22     | 0.78 (0.65 to 0.93)                                                 | 0.007    | 0.89 (0.77 to 1.03)                                               | 0.13     |
| Age: quadratic (age-mean) <sup>2</sup>            | -                                                                   | 1.0000 (0.9998 to 1.0002)                                             | 0.99     | 0.9999 (0.9997 to 1.0001)                                    | 0.37     | 0.9995 (0.9987 to 1.0003)                                           | 0.23     | 0.9997 (0.9990 to 1.0005)                                         | 0.48     |
| Dependent child in household                      | None                                                                | Ref                                                                   | -        | Ref                                                          | -        | Ref                                                                 | -        | Ref                                                               | -        |
|                                                   | Child present                                                       | 1.07 (0.93 to 1.23)                                                   | 0.34     | 1.15 (1.01 to 1.31)                                          | 0.04     | 1.33 (0.98 to 1.81)                                                 | 0.07     | 1.21 (0.91 to 1.61)                                               | 0.20     |
| At high risk (self)                               | No                                                                  | Ref                                                                   | -        | Ref                                                          | -        | Ref                                                                 | -        | Ref                                                               | -        |
|                                                   | Yes                                                                 | 0.88 (0.75 to 1.03)                                                   | 0.10     | 0.96 (0.83 to 1.10)                                          | 0.53     | 0.99 (0.69 to 1.41)                                                 | 0.94     | 0.83 (0.57 to 1.22)                                               | 0.35     |
| Household member has chronic illness              | No                                                                  | Ref                                                                   | -        | Ref                                                          | -        | Ref                                                                 | -        | Ref                                                               | -        |
|                                                   | Yes                                                                 | 0.95 (0.80 to 1.13)                                                   | 0.57     | 1.14 (0.98 to 1.33)                                          | 0.08     | 1.12 (0.68 to 1.84)                                                 | 0.66     | 0.97 (0.61 to 1.55)                                               | 0.90     |
| Employment status                                 | Not working                                                         | Ref                                                                   | -        | Ref                                                          | -        | -                                                                   | -        | -                                                                 | -        |
|                                                   | Working                                                             | 1.07 (0.92 to 1.23)                                                   | 0.37     | 0.97 (0.85 to 1.11)                                          | 0.65     | -                                                                   | -        | -                                                                 | -        |
| Socio-economic grade                              | ABC1                                                                | Ref                                                                   | -        | Ref                                                          | -        | Ref                                                                 | -        | Ref                                                               | -        |
|                                                   | C2DE                                                                | 1.06 (0.93 to 1.20)                                                   | 0.38     | 0.98 (0.87 to 1.10)                                          | 0.74     | 0.70 (0.51 to 0.96)                                                 | 0.03     | 0.85 (0.61 to 1.18)                                               | 0.32     |
| Index of multiple deprivation                     | 1 <sup>st</sup> (least) to 4 <sup>th</sup> quartile (most deprived) | 0.95 (0.90 to 1.01)                                                   | 0.10     | 0.95 (0.89 to 1.00)                                          | 0.05     | 0.97 (0.84 to 1.12)                                                 | 0.71     | 0.84 (0.73 to 0.97)                                               | 0.02     |
| Highest educational or professional qualification | Less than degree                                                    | Ref                                                                   | -        | Ref                                                          | -        | Ref                                                                 | -        | Ref                                                               | -        |
|                                                   | Degree or higher                                                    | 0.96 (0.84 to 1.10)                                                   | 0.54     | 1.02 (0.90 to 1.16)                                          | 0.74     | 0.83 (0.63 to 1.11)                                                 | 0.22     | 0.64 (0.47 to 0.87)                                               | 0.004    |
| Ethnicity                                         | White British                                                       | Ref                                                                   | -        | Ref                                                          | -        | Ref                                                                 | -        | Ref                                                               | -        |
|                                                   | White other                                                         | 1.21 (0.88 to 1.64)                                                   | 0.24     | 0.76 (0.55 to 1.06)                                          | 0.11     | 1.36 (0.69 to 2.68)                                                 | 0.38     | 0.97 (0.51 to 1.84)                                               | 0.92     |
|                                                   | Black and minority ethnicity                                        | 0.87 (0.71 to 1.07)                                                   | 0.20     | 1.06 (0.88 to 1.27)                                          | 0.55     | 1.03 (0.70 to 1.49)                                                 | 0.90     | 0.98 (0.67 to 1.44)                                               | 0.92     |
|                                                   | Overall                                                             | $\chi^2(2)=4.3$                                                       | 0.12     | $\chi^2(2)=3.9$                                              | 0.14     | $\chi^2(2)=0.8$                                                     | 0.68     | $\chi^2(2)=0.0$                                                   | 0.99     |

|                    |                              |                     |       |                            |                  |                     |      |                     |      |
|--------------------|------------------------------|---------------------|-------|----------------------------|------------------|---------------------|------|---------------------|------|
| First language     | Not English                  | Ref                 | -     | Ref                        | -                | Ref                 | -    | Ref                 | -    |
|                    | English                      | 0.72 (0.55 to 0.93) | 0.013 | 0.71 (0.55 to 0.92)        | 0.01             | 1.23 (0.74 to 2.04) | 0.42 | 0.68 (0.41 to 1.12) | 0.13 |
| Ever had COVID-19  | Think not                    | Ref                 | -     | Ref                        | -                | Ref                 | -    | Ref                 | -    |
|                    | Think yes                    | 1.17 (1.02 to 1.34) | 0.03  | 0.95 (0.84 to 1.09)        | 0.48             | 0.92 (0.68 to 1.25) | 0.60 | 0.96 (0.71 to 1.30) | 0.80 |
| Vaccination status | Not vaccinated               | Ref                 | -     | Ref                        | -                | Ref                 | -    | Ref                 | -    |
|                    | 1 dose                       | 1.19 (0.89 to 1.57) | 0.24  | 1.16 (0.89 to 1.51)        | 0.27             | 1.37 (0.81 to 2.32) | 0.24 | 1.47 (0.87 to 2.47) | 0.15 |
|                    | 2 doses or more              | 0.98 (0.82 to 1.18) | 0.85  | 0.80 (0.68 to 0.96)        | 0.01             | 0.95 (0.64 to 1.40) | 0.78 | 1.10 (0.76 to 1.60) | 0.62 |
|                    | Overall                      | $\chi^2(2)=2.2$     | 0.34  | $\chi^2(2)=12.5$           | 0.002            | $\chi^2(2)=2.6$     | 0.27 | $\chi^2(2)=2.1$     | 0.34 |
| Financial hardship | Range 3 (least) to 15 (most) | 1.01 (0.99 to 1.03) | 0.21  | <b>1.03 (1.02 to 1.05)</b> | <b>&lt;0.001</b> | 1.02 (0.97 to 1.07) | 0.40 | 1.06 (1.01 to 1.10) | 0.02 |

a) 1622 people were eligible for inclusion in analyses investigating going out shopping analyses. There were different amounts of missing data depending on variables included in the models, so n ranged between 1440 and 1491 for different models.

b) 1841 people were eligible for inclusion in analyses investigating going out shopping analyses. There were different amounts of missing data depending on variables included in the models, so n ranged between 1671 and 1713 for different models.

c) 374 people were eligible for inclusion in analyses investigating non-essential workplace attendance (sample limited to people who reported they could work entirely from home). Due to missing data, n included in analyses ranged between 349 and 354.

d) 410 people were eligible for inclusion in analyses investigating non-essential workplace attendance (sample limited to people who reported they could work entirely from home). Due to missing data, n included in analyses ranged between 379 and 389.

Table 2. Associations between highest risk social mixing and socio-demographic factors, adjusting for all other socio-demographic characteristics. Results reported are for block 1 of worry analyses. Bolding denotes significant findings ( $p < .002$ ).

| Attribute                    | Level                                  | Highest risk social mixing                                                                    |                 |                                                                                             | Wearing a face covering in shops                                                     |                            |                                                                                    |                            | Wearing a face covering in hospitality venues                                                     |                           |                                                                                                 |                           |                  |
|------------------------------|----------------------------------------|-----------------------------------------------------------------------------------------------|-----------------|---------------------------------------------------------------------------------------------|--------------------------------------------------------------------------------------|----------------------------|------------------------------------------------------------------------------------|----------------------------|---------------------------------------------------------------------------------------------------|---------------------------|-------------------------------------------------------------------------------------------------|---------------------------|------------------|
|                              |                                        | Wave 63.5 <sup>a</sup><br>aOR for<br>engaging in<br>highest risk<br>social mixing<br>(95% CI) | <i>p</i>        | Wave 64 <sup>b</sup><br>aOR for<br>engaging in<br>highest risk<br>social mixing<br>(95% CI) | Wave 63.5 <sup>c</sup><br>aOR for<br>wearing a face<br>covering in<br>shops (95% CI) | <i>p</i>                   | Wave 64 <sup>d</sup><br>aOR for<br>wearing a face<br>covering in<br>shops (95% CI) | <i>p</i>                   | Wave 63.5 <sup>e</sup><br>aOR for wearing<br>a face covering in<br>hospitality<br>venues (95% CI) | <i>p</i>                  | Wave 64 <sup>f</sup><br>aOR for wearing<br>a face covering in<br>hospitality<br>venues (95% CI) | <i>p</i>                  |                  |
| Region                       | East Midlands                          | Ref                                                                                           | -               | Ref                                                                                         | Ref                                                                                  | -                          | Ref                                                                                | -                          | Ref                                                                                               | -                         | Ref                                                                                             | -                         |                  |
|                              | East of England                        | 1.58 (0.99 to 2.54)                                                                           | 0.06            | 0.89 (0.57 to 1.39)                                                                         | 0.61                                                                                 | 1.04 (0.54 to 2.02)        | 0.91                                                                               | 0.55 (0.26 to 1.18)        | 0.13                                                                                              | 0.59 (0.29 to 1.24)       | 0.17                                                                                            | 1.17 (0.60 to 2.25)       | 0.65             |
|                              | London                                 | 1.36 (0.82 to 2.26)                                                                           | 0.23            | 0.94 (0.61 to 1.45)                                                                         | 0.77                                                                                 | 1.12 (0.57 to 2.18)        | 0.75                                                                               | 0.48 (0.23 to 1.00)        | 0.05                                                                                              | 0.52 (0.25 to 1.09)       | 0.08                                                                                            | 0.91 (0.50 to 1.66)       | 0.76             |
|                              | North East                             | 1.52 (0.79 to 2.91)                                                                           | 0.21            | 1.31 (0.76 to 2.27)                                                                         | 0.33                                                                                 | 0.99 (0.42 to 2.35)        | 0.99                                                                               | 0.46 (0.19 to 1.11)        | 0.08                                                                                              | 0.47 (0.18 to 1.22)       | 0.12                                                                                            | 2.04 (0.97 to 4.33)       | 0.06             |
|                              | North West                             | 1.25 (0.75 to 2.06)                                                                           | 0.39            | 1.17 (0.77 to 1.79)                                                                         | 0.45                                                                                 | 0.86 (0.44 to 1.67)        | 0.65                                                                               | <b>0.31 (0.15 to 0.62)</b> | <b>0.001</b>                                                                                      | 0.44 (0.21 to 0.96)       | 0.04                                                                                            | 0.67 (0.36 to 1.24)       | 0.20             |
|                              | South East                             | 1.59 (1.00 to 2.51)                                                                           | 0.05            | 1.17 (0.77 to 1.76)                                                                         | 0.46                                                                                 | 0.93 (0.50 to 1.73)        | 0.81                                                                               | 0.49 (0.24 to 1.00)        | 0.05                                                                                              | 0.51 (0.25 to 1.02)       | 0.06                                                                                            | 1.28 (0.71 to 2.30)       | 0.42             |
|                              | South West                             | 1.34 (0.80 to 2.23)                                                                           | 0.27            | 1.03 (0.66 to 1.62)                                                                         | 0.89                                                                                 | 1.02 (0.51 to 2.02)        | 0.96                                                                               | 0.44 (0.21 to 0.94)        | 0.03                                                                                              | 0.65 (0.29 to 1.43)       | 0.28                                                                                            | 1.27 (0.68 to 2.38)       | 0.45             |
|                              | West Midlands                          | 1.27 (0.77 to 2.11)                                                                           | 0.35            | 1.01 (0.65 to 1.59)                                                                         | 0.96                                                                                 | 1.07 (0.54 to 2.11)        | 0.85                                                                               | 0.34 (0.16 to 0.71)        | 0.004                                                                                             | 0.52 (0.24 to 1.10)       | 0.09                                                                                            | 1.01 (0.52 to 1.97)       | 0.97             |
|                              | Yorkshire and The Humber               | 1.34 (0.73 to 2.46)                                                                           | 0.35            | 1.21 (0.78 to 1.87)                                                                         | 0.40                                                                                 | 1.21 (0.53 to 2.75)        | 0.65                                                                               | 0.33 (0.16 to 0.69)        | 0.003                                                                                             | 0.26 (0.10 to 0.70)       | 0.008                                                                                           | 1.22 (0.64 to 2.32)       | 0.54             |
|                              | Overall                                |                                                                                               | $\chi^2(8)=5.6$ | 0.69                                                                                        | $\chi^2(8)=5.0$                                                                      | 0.76                       | $\chi^2(8)=1.6$                                                                    | 0.99                       | $\chi^2(8)=15.2$                                                                                  | 0.05                      | $\chi^2(8)=8.8$                                                                                 | 0.36                      | $\chi^2(8)=12.3$ |
| Sex                          | Male                                   | Ref                                                                                           | -               | Ref                                                                                         | -                                                                                    | Ref                        | -                                                                                  | Ref                        | -                                                                                                 | Ref                       | -                                                                                               | Ref                       | -                |
|                              | Female                                 | 1.40 (1.12 to 1.74)                                                                           | 0.003           | 1.35 (1.10 to 1.65)                                                                         | 0.003                                                                                | <b>1.64 (1.22 to 2.21)</b> | <b>0.001</b>                                                                       | 1.37 (1.03 to 1.83)        | 0.03                                                                                              | 1.34 (0.96 to 1.86)       | 0.08                                                                                            | 1.46 (1.09 to 1.95)       | 0.01             |
| Age (per decade)             | Raw age                                | 0.98 (0.90 to 1.06)                                                                           | 0.55            | 0.95 (0.88 to 1.02)                                                                         | 0.15                                                                                 | 1.18 (1.05 to 1.32)        | 0.005                                                                              | <b>1.22 (1.10 to 1.35)</b> | <b>&lt;0.001</b>                                                                                  | 1.03 (0.91 to 1.16)       | 0.66                                                                                            | 1.06 (0.96 to 1.18)       | 0.24             |
|                              | Age: quadratic (age-mean) <sup>2</sup> | 1.0000 (0.9996 to 1.0004)                                                                     | 0.97            | 1.0002 (0.9999 to 1.0006)                                                                   | 0.20                                                                                 | 1.0000 (0.9995 to 1.0006)  | 0.91                                                                               | 0.9998 (0.9993 to 1.0003)  | 0.40                                                                                              | 0.9999 (0.9993 to 1.0005) | 0.64                                                                                            | 1.0006 (1.0001 to 1.0011) | 0.02             |
| Dependent child in household | None                                   | Ref                                                                                           | -               | Ref                                                                                         | -                                                                                    | Ref                        | -                                                                                  | Ref                        | -                                                                                                 | Ref                       | -                                                                                               | Ref                       | -                |
|                              | Child present                          | 0.82 (0.63 to 1.06)                                                                           | 0.13            | 0.83 (0.65 to 1.05)                                                                         | 0.12                                                                                 | <b>0.56 (0.41 to 0.78)</b> | <b>0.001</b>                                                                       | 0.93 (0.68 to 1.28)        | 0.66                                                                                              | 0.97 (0.67 to 1.41)       | 0.88                                                                                            | 1.68 (1.19 to 2.37)       | 0.003            |
| At high risk (self)          | No                                     | Ref                                                                                           | -               | Ref                                                                                         | -                                                                                    | Ref                        | -                                                                                  | Ref                        | -                                                                                                 | Ref                       | -                                                                                               | Ref                       | -                |
|                              | Yes                                    | 0.90 (0.67 to 1.19)                                                                           | 0.45            | 0.77 (0.59 to 1.01)                                                                         | 0.05                                                                                 | 1.14 (0.77 to 1.69)        | 0.50                                                                               | 0.80 (0.56 to 1.16)        | 0.24                                                                                              | 1.32 (0.87 to 2.00)       | 0.19                                                                                            | 1.34 (0.91 to 1.96)       | 0.13             |
|                              | No                                     | Ref                                                                                           | -               | Ref                                                                                         | -                                                                                    | Ref                        | -                                                                                  | Ref                        | -                                                                                                 | Ref                       | -                                                                                               | Ref                       | -                |

|                                                   |                                                                     |                     |       |                     |      |                            |                  |                            |                  |                            |                  |                     |       |
|---------------------------------------------------|---------------------------------------------------------------------|---------------------|-------|---------------------|------|----------------------------|------------------|----------------------------|------------------|----------------------------|------------------|---------------------|-------|
| Household member has chronic illness              | Yes                                                                 | 0.83 (0.61 to 1.13) | 0.24  | 1.07 (0.81 to 1.41) | 0.64 | 0.84 (0.55 to 1.27)        | 0.40             | 0.85 (0.58 to 1.25)        | 0.42             | 0.96 (0.60 to 1.55)        | 0.88             | 1.47 (0.97 to 2.22) | 0.07  |
| Employment status                                 | Not working                                                         | Ref                 | -     | Ref                 | -    | Ref                        | -                | Ref                        | -                | Ref                        | -                | Ref                 | -     |
|                                                   | Working                                                             | 0.76 (0.58 to 0.99) | 0.04  | 0.77 (0.60 to 0.98) | 0.04 | 0.98 (0.69 to 1.40)        | 0.92             | 1.01 (0.72 to 1.42)        | 0.96             | 0.63 (0.42 to 0.95)        | 0.03             | 0.96 (0.66 to 1.38) | 0.81  |
| Socio-economic grade†                             | ABC1                                                                | Ref                 | -     | Ref                 | -    | Ref                        | -                | Ref                        | -                | Ref                        | -                | Ref                 | -     |
|                                                   | C2DE                                                                | 0.89 (0.71 to 1.13) | 0.34  | 0.79 (0.64 to 0.98) | 0.03 | 0.76 (0.56 to 1.04)        | 0.09             | 0.74 (0.55 to 1.01)        | 0.06             | 0.84 (0.59 to 1.20)        | 0.34             | 0.88 (0.64 to 1.21) | 0.43  |
| Index of multiple deprivation                     | 1 <sup>st</sup> (least) to 4 <sup>th</sup> quartile (most deprived) | 1.02 (0.91 to 1.14) | 0.71  | 1.03 (0.93 to 1.14) | 0.54 | 1.01 (0.87 to 1.17)        | 0.93             | 1.07 (0.93 to 1.24)        | 0.34             | 0.99 (0.84 to 1.18)        | 0.95             | 1.04 (0.89 to 1.21) | 0.61  |
| Highest educational or professional qualification | Less than degree                                                    | Ref                 | -     | Ref                 | -    | Ref                        | -                | Ref                        | -                | Ref                        | -                | Ref                 | -     |
|                                                   | Degree or higher                                                    | 1.05 (0.83 to 1.34) | 0.68  | 1.05 (0.84 to 1.32) | 0.66 | 1.16 (0.83 to 1.61)        | 0.38             | 1.21 (0.86 to 1.70)        | 0.27             | 1.03 (0.72 to 1.46)        | 0.88             | 1.40 (1.01 to 1.95) | 0.04  |
| Ethnicity                                         | White British                                                       | Ref                 | -     | Ref                 | -    | Ref                        | -                | Ref                        | -                | Ref                        | -                | Ref                 | -     |
|                                                   | White other                                                         | 1.16 (0.64 to 2.11) | 0.63  | 0.99 (0.54 to 1.80) | 0.96 | 1.17 (0.54 to 2.50)        | 0.69             | 0.84 (0.38 to 1.85)        | 0.67             | 0.52 (0.21 to 1.30)        | 0.16             | 1.57 (0.66 to 3.72) | 0.31  |
|                                                   | Black and minority ethnicity                                        | 0.69 (0.47 to 1.03) | 0.07  | 0.81 (0.57 to 1.16) | 0.25 | 1.39 (0.86 to 2.26)        | 0.18             | 1.65 (1.02 to 2.68)        | 0.04             | 1.49 (0.87 to 2.55)        | 0.14             | 1.40 (0.85 to 2.29) | 0.19  |
|                                                   | Overall                                                             | $\chi^2(2)=4.4$     | 0.11  | $\chi^2(2)=1.5$     | 0.48 | $\chi^2(2)=1.8$            | 0.41             | $\chi^2(2)=5.4$            | 0.07             | $\chi^2(2)=5.4$            | 0.07             | $\chi^2(2)=2.1$     | 0.35  |
| First language                                    | Not English                                                         | Ref                 | -     | Ref                 | -    | Ref                        | -                | Ref                        | -                | Ref                        | -                | Ref                 | -     |
|                                                   | English                                                             | 1.45 (0.86 to 2.47) | 0.17  | 0.90 (0.55 to 1.49) | 0.68 | 1.09 (0.58 to 2.02)        | 0.80             | 0.91 (0.46 to 1.78)        | 0.77             | 1.48 (0.72 to 3.03)        | 0.28             | 1.10 (0.56 to 2.16) | 0.79  |
| Ever had COVID-19                                 | Think not                                                           | Ref                 | -     | Ref                 | -    | Ref                        | -                | Ref                        | -                | Ref                        | -                | Ref                 | -     |
|                                                   | Think yes                                                           | 1.01 (0.78 to 1.31) | 0.93  | 1.31 (1.03 to 1.66) | 0.03 | 1.11 (0.80 to 1.54)        | 0.54             | 0.85 (0.62 to 1.18)        | 0.34             | 1.13 (0.78 to 1.64)        | 0.50             | 0.63 (0.45 to 0.87) | 0.006 |
| Vaccination status                                | Not vaccinated                                                      | Ref                 | -     | Ref                 | -    | Ref                        | -                | Ref                        | -                | Ref                        | -                | Ref                 | -     |
|                                                   | 1 dose                                                              | 0.72 (0.41 to 1.26) | 0.25  | 0.61 (0.36 to 1.01) | 0.06 | 2.62 (1.37 to 4.99)        | 0.003            | <b>2.62 (1.48 to 4.66)</b> | <b>0.001</b>     | <b>3.83 (1.86 to 7.88)</b> | <b>&lt;0.001</b> | 1.22 (0.63 to 2.39) | 0.55  |
|                                                   | 2 doses or more                                                     | 0.90 (0.64 to 1.26) | 0.54  | 0.98 (0.71 to 1.35) | 0.92 | <b>2.31 (1.56 to 3.40)</b> | <b>&lt;0.001</b> | <b>4.44 (3.05 to 6.48)</b> | <b>&lt;0.001</b> | 2.29 (1.35 to 3.87)        | 0.002            | 1.34 (0.84 to 2.15) | 0.22  |
|                                                   | Overall                                                             | $\chi^2(2)=1.4$     | 0.51  | $\chi^2(2)=4.3$     | 0.11 | $\chi^2(2)=19.4$           | <b>&lt;0.001</b> | $\chi^2(2)=60.1$           | <b>&lt;0.001</b> | $\chi^2(2)=14.9$           | <b>0.001</b>     | $\chi^2(2)=1.5$     | 0.48  |
| Financial hardship                                | Range 3 (least) to 15 (most)                                        | 0.95 (0.92 to 0.98) | 0.004 | 0.96 (0.92 to 0.99) | 0.01 | 0.97 (0.93 to 1.02)        | 0.21             | 0.94 (0.9 to 0.99)         | 0.02             | 1.03 (0.97 to 1.08)        | 0.33             | 1.01 (0.96 to 1.06) | 0.65  |

a) 1622 people were eligible for inclusion in highest risk social mixing analyses. There were different amounts of missing data depending on variables included in the models, so n ranged between 1439 and 1446 for different models.

b) 1841 people were eligible for inclusion in highest risk social mixing analyses. There were different amounts of missing data depending on variables included in the models, so n ranged between 1668 and 1689 for different models.

c) 1404 people were eligible for inclusion in wearing a face covering in shops analyses (sample limited to people who reported having been out shopping in the last week). There were different amounts of missing data depending on variables included in the models, so n ranged between 1247 and 1266 for different models.

d) 1600 people were eligible for inclusion in wearing a face covering in shops analyses (sample limited to people who reported having been out shopping in the last week). There were different amounts of missing data depending on variables included in the models, so n ranged between 1454 and 1475 for different models.

e) 789 people were eligible for inclusion in wearing a face covering in hospitality venues analyses (sample limited to people who reported having been out to hospitality venues in the last week). There were different amounts of missing data depending on variables included in the models, so n ranged between 700 and 713 for different models.

f) 894 people were eligible for inclusion in wearing a face covering in hospitality venues analyses (sample limited to people who reported having been out to hospitality venues in the last week). There were different amounts of missing data depending on variables included in the models, so n ranged between 817 and 829 for different models.
